# Supplementary material for: Long-range ordered TiO2/Au hollow urchins: topology control for maskless electrodeposition
Source: Royal Society of Chemistry journal article supplement (doi:10.1039/d0ta07615e), 2020-01-01
Supplement: d0ta07615e3.pdf [file d0ta07615e3.pdf]

## Supporting Information

### **Long-range ordered TiO<sub>2</sub>/Au hollow urchin: Topology control for maskless electrodeposition**

Ahmad Esmailzadeh Kandjani, Ylias M. Sabri, Victoria E. Coyle, Christopher J. Harrison, Dilek Korcoban, Ram Kumar Canjeevaram Balasubramanyam, Lathe A. Jones, Matthew R. Field and Suresh K. Bhargava

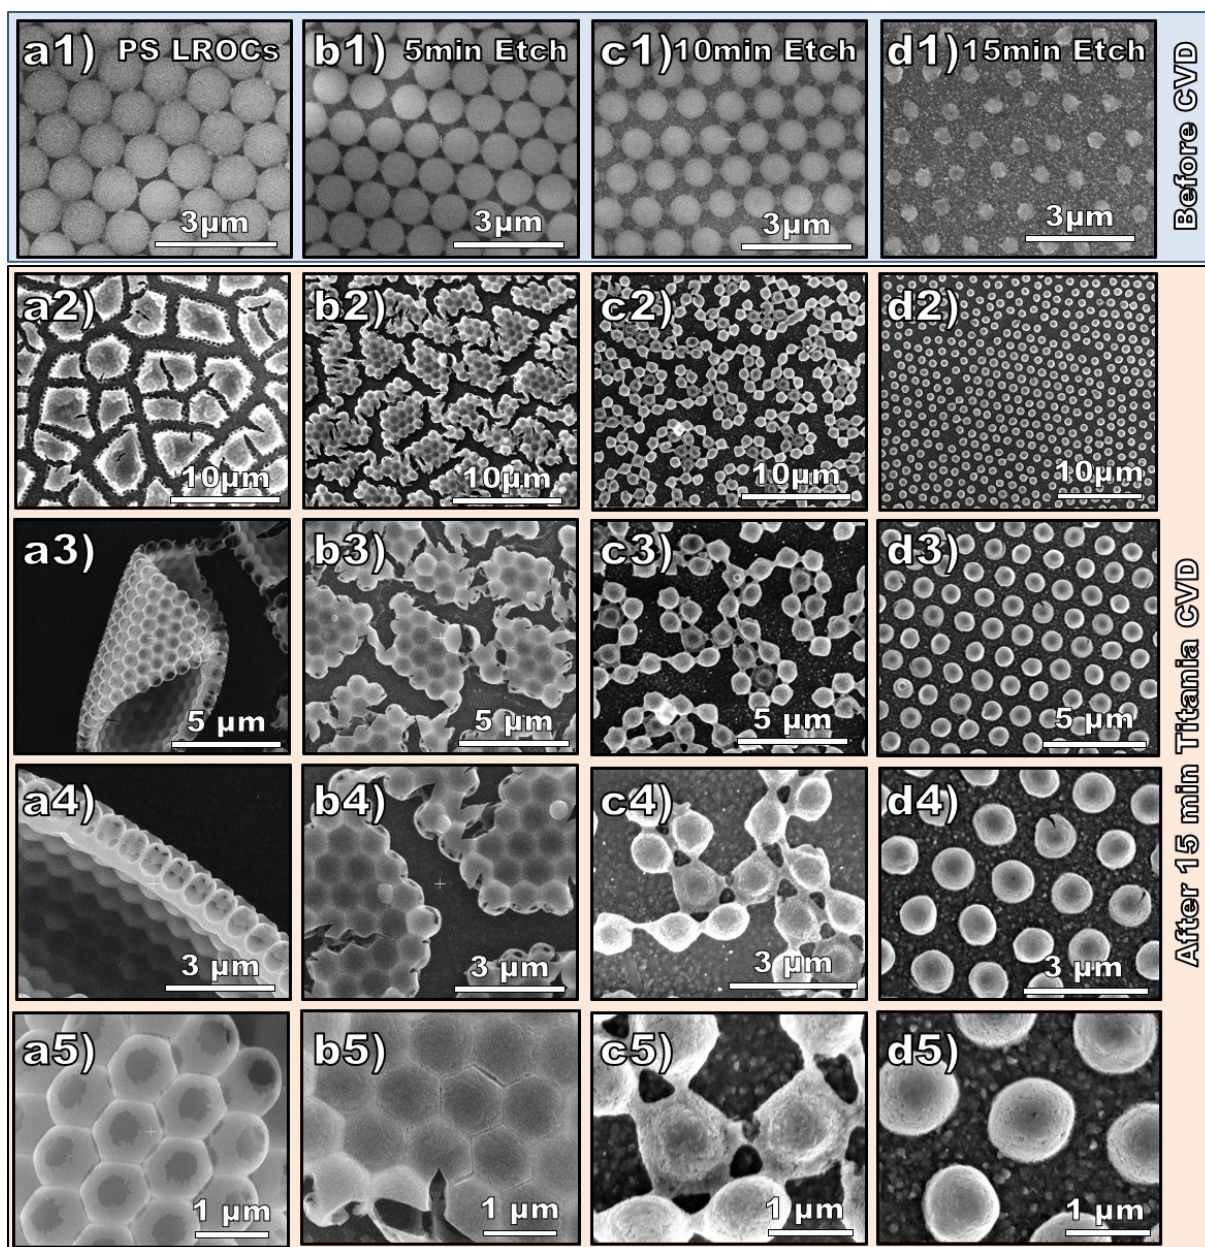

**Figure S1.** SEM images of PS LROCs before and after 15 min  $\text{TiO}_2$  CVD following by  $550^\circ\text{C}$  calcination for 1 hr for **a)** PS LROCs and after oxygen plasma etching for **b)** 5, **c)** 10 and **d)** 15 mins.

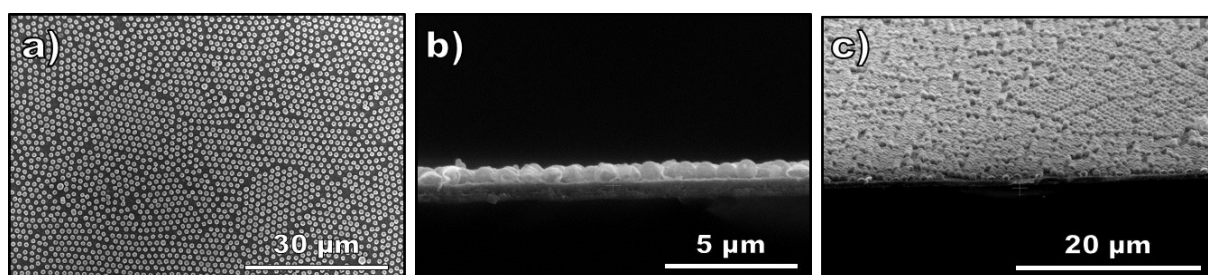

**Figure S2.** SEM images of titania LROCs after calcinations **a)** low magnification **b)** side view, and **c)** 30° angle view. These images show the uniformity of the developed TiO<sub>2</sub> monolayered structures covering a large surface area of the samples.

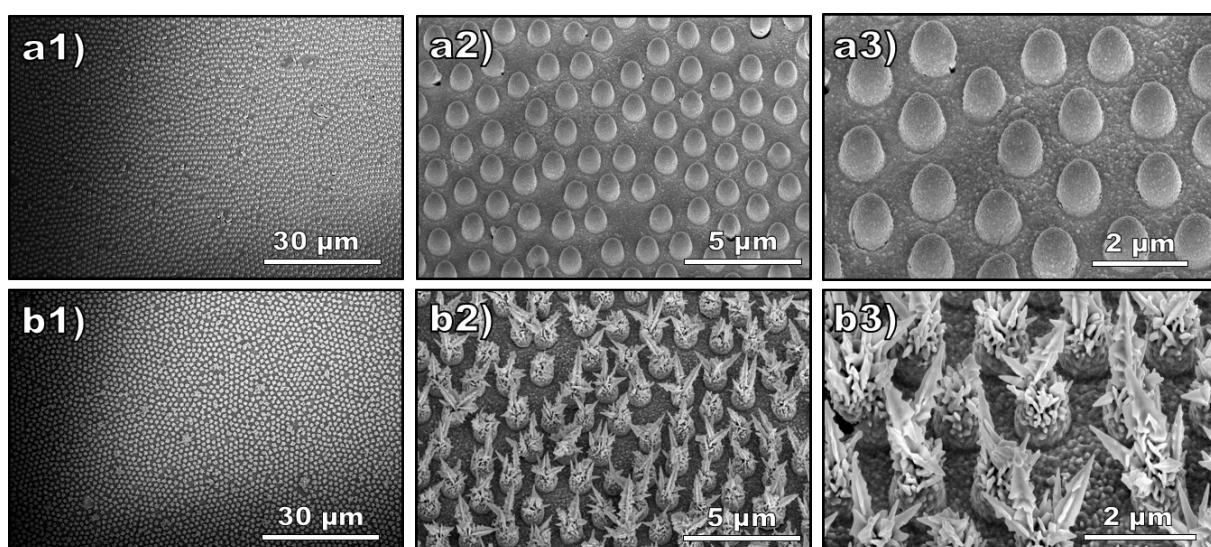

**Figure S3.** Low and high magnification SEM images of  $\text{TiO}_2/\text{Au}$  LROCs **a)** before electrodeposition and **b)** after 12 mins spike electrodeposition; the spikes only grow on  $\text{TiO}_2$  LROCs and the area between the colloids show no formation of gold spikes.

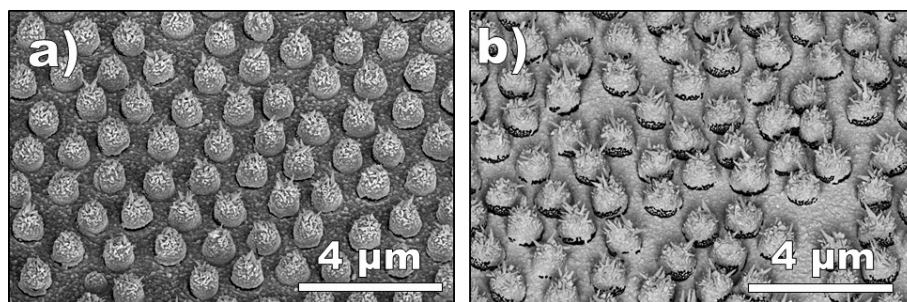

**Figure S4.** **a)** Secondary and **b)** backscatter SEM images of  $\text{TiO}_2/\text{Au}$  urchin LROCs electrodeposited for 9 mins. The light areas in the backscatter image are showing the Au deposited areas with the dark areas directly under the spheres representing  $\text{TiO}_2$ .

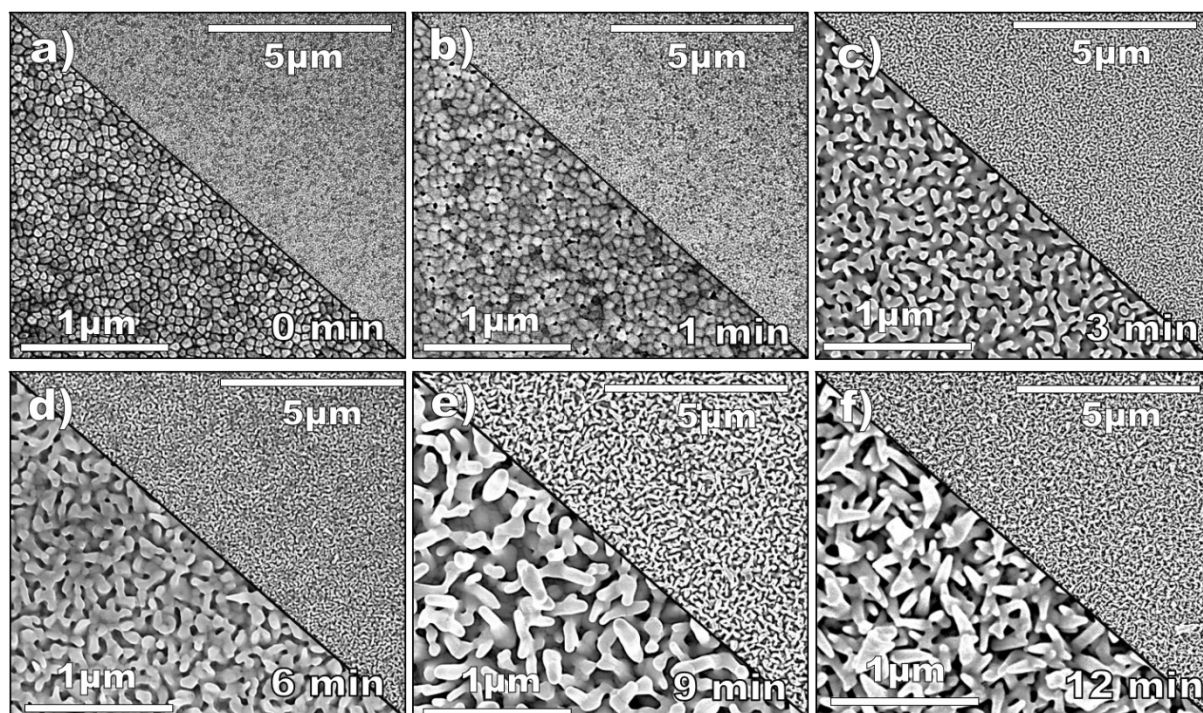

**Figure S5.** SEM images of Au spikes electrodeposited on Si/Au (150 nm) substrates for **a)** 0, **b)** 1, **c)** 3, **d)** 6, **e)** 9 and **f)** 12 mins after e-beam evaporation.

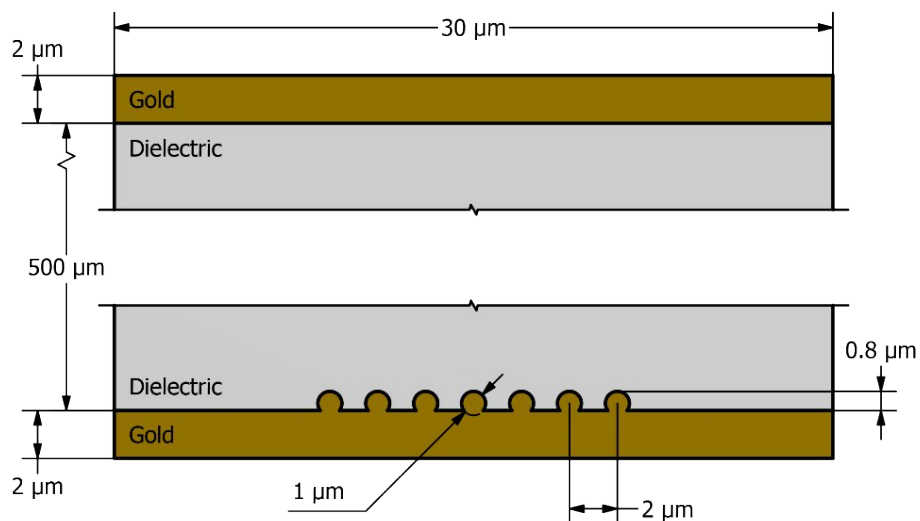

**Figure S6.** Schematics of the FEM model used for studying the electrical potential and field generated between two parallel electrodes with flat and spherical LROCs on one of the electrodes.

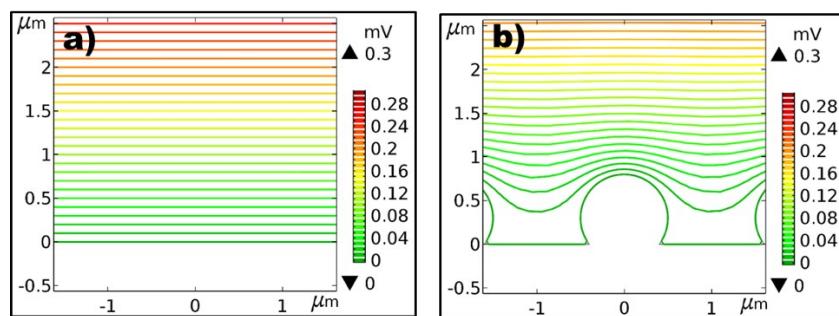

**Figure S7.** FEM model of electrical potentials for **a)** flat Au and **b)** ordered spherical LROCs considering complete conductive layers.

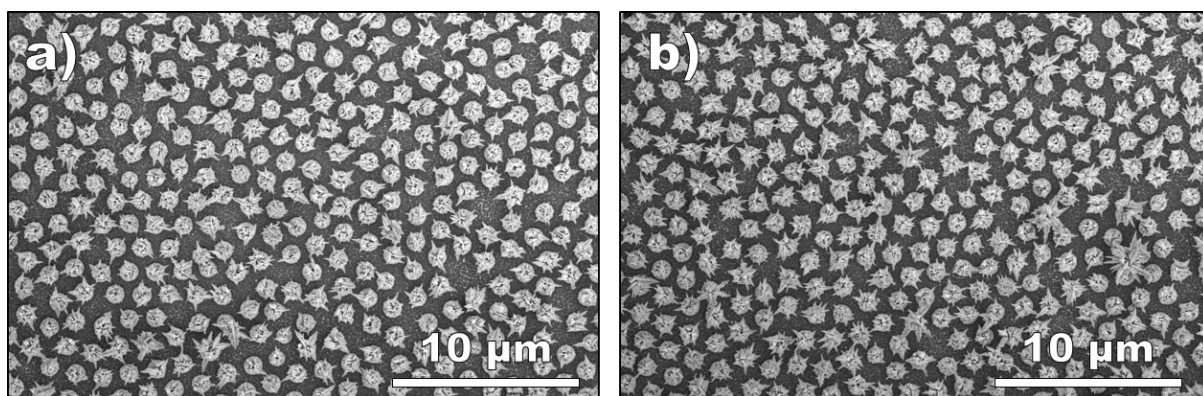

**Figure S8.** Low magnification SEM images of TiO<sub>2</sub>/Au urchin LROCs after 9 mins electrodeposition a) as produced; and , b) after 3 months of testing.

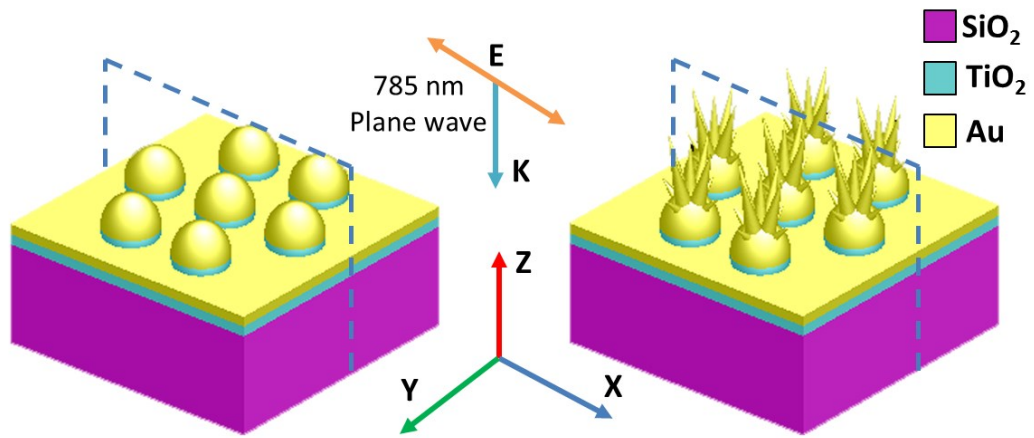

**Figure S9.** The simulated LROC unit cells used for TiO<sub>2</sub>/Au and TiO<sub>2</sub>/Au urchin LROCs. The dashed plane is the slicing 2D plane where the FDTD simulation was performed on the middle micro-shell in the structure.

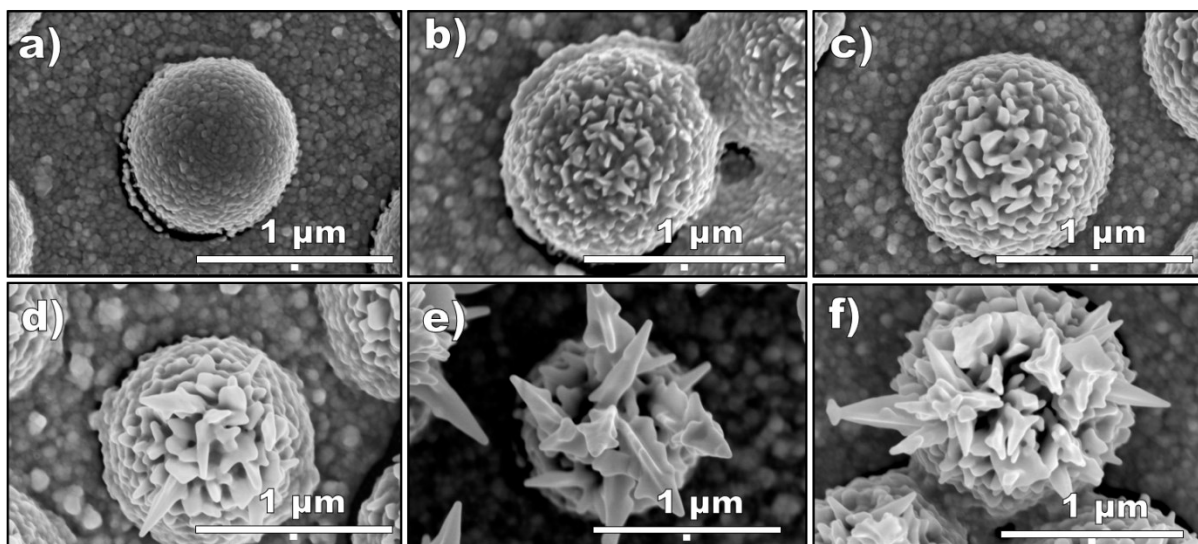

**Figure S10.** High magnification SEM images of the individual  $\text{TiO}_2/\text{Au}$  LROCs with Au electrodeposition times of **a)** 0, **b)** 1, **c)** 3, **d)** 6, **e)** 9 and **f)** 12 mins.
